# Supplementary material for: A Comparative Study of Composition and Soluble Polysaccharide Content between Brewer’s Spent Yeast and Cultured Yeast Cells
Source: Preprints.org preprint supplement (doi:10.20944/preprints202404.1218.v1), 2024-04-18
Supplement: Supplementary file 1 [file supplementary]

**Supplementary data**

**Table S1**. **Insoluble polysaccharide of alkali extraction derived from autolysate residue.**

| Samples | β-glucan  (as glucose) | Mannan/Mannoprotein (as mannose) | Chitin  (as *N*-acetyl-glucosamine) |
| --- | --- | --- | --- |
| BSY | 778.50 ± 20.25a | 41.50±0.99c | 3.61±0.11c |
| SC | 631.86 ± 14.25c | 61.78±1.63a | 36.29±0.12a |
| SB | 697.80 ± 10.13b | 58.86±1.63b | 23.13±0.15b |

* BSY, Brewer’s spent yeast, SC: *S. cerevisiae*; SB: *S. boulardii*. Values are means ± SD (n = 3). *Means with different superscript in the same column are significantly different *p* < 0.05.
